# Supplementary material
Source: Research Square preprint supplement (doi:10.21203/rs.3.rs-10225989/v1)
Supplement: Supplementary file 1 [file 39fdd2e33b3f2f1b9ed43f99.docx]

Table 1: Sociodemographic characteristics of the study participant and systemic disorders (N=200)

| Socio-demographic characteristics | | | Frequency (%) | |
| --- | --- | --- | --- | --- |
| Sex | Male | | 107(53.5) | |
| Female | | 93(46.6) | |
| Age | 65-75 | 131(65.5) | | |
| 76-84 | 62(31) | | |
| ≥85 | 7(3.5) | | |
| Living condition | Spouse | 103(51.5) | | |
| With family | 49(24.5) | | |
| Alone | 48(24) | | |
| Monthly income | 1000 | 16(8) | | |
| 1000-4999 | 165(82.5) | | |
| ≥5000 | 19(9.5) | | |
| Educational level | Elementary | 59(29.5) | |
| secondary and preparatory | 43(21.5) | |
| Diploma | 30(15) | |
| degree and above | 21(10.5) | |
| Illiterate | 47(23.5) | |
| Systemic disease |  |  | |
| Hypertension |  | 63 (31.5) | |
| Diabetes mellitus |  | 119 ( 59.5) | |
| Dermatoligic disorder |  | 8(4) | |
| Heart disease |  | 7 (3.5) | |
| Osteoarthritis |  | 5 (2.5) | |
| Renalcalculi |  | 4(2) | |
| Gout |  | 4 (2) | |
| Begnian prostate hyperplasia |  | 5(1.85) | |
| Other* |  | 3(1.5) | |

*Hypercholesterolemia, chronic kidney disease, liver cirrhosis

**Table 2Frequent asked questions and gathered information’s from participants**

| Variables | Frequency | Percent |
| --- | --- | --- |
| **Did you ask enough information regarding your medication when you obtain your self-medication?** |  |  |
| Yes | 116 | 69.5 |
| No | 51 | 30.5 |
| **Have you encountered problems while using self-medication?** |  |  |
| Yes | 55 | 32.9 |
| No | 112 | 67.1 |
| **Have you finished/discontinued your self-medication?** |  |  |
| Finished | 134 | 80.2 |
| Discontinued | 33 | 19.8 |

Table3: factors associated with self-medication use (N=200)

| Variable | Self- medication | | | COR | AOR | P value |
| --- | --- | --- | --- | --- | --- | --- |
|  | Yes | | No |  |  |  |
| Sex |  | |  |  |  |  |
| Female | 88 | | 18 | 2.67(1.357-4.935) | 3.260(1.612–6.592) | 0.001 |
| Male | 75 | | 41 | 1 | 1 |  |
| Age |  | |  |  |  |  |
| 65-75 | 91 | | 40 | 1 |  |  |
| 76-84 | 43 | | 17 | 1.112(0.567-2.180) | 2.55(1.06-4.01) | 0.63 |
| ≥85 | 7 | | 2 | 1.538(0.306-7.734) | 3.21(1.64-5.32) | 0.42 |
| Average monthly income | |  |  |  |  |  |
| <1000 birr | 3 | | 3 | 1 | 1 |  |
| 1000-4999birr | 114 | | 53 | 0.46(0.42-3.133) | 2.371(0.391-14.377) | .348 |
| ≥5000 | 24 | | 3 | 0.27(0.14-2.52) | 6.02(2.5- 12.24) | .033 |
| Educational status |  | |  |  |  |  |
| Elementary | 50 | | 9 | 1 | 1 |  |
| Secondary and preparatory | 24 | | 19 | 4.4(1.23-6.24) | 3.224(1.084-5.595) | .003 |
| Diploma | 20 | | 10 | 2.77(.127-6.45) | 2.434(0.144-1.307) | .138 |
| Degree and above | 15 | | 6 | 2.22(1.06-4.69) | 1.374(0.101-1.378) | .139 |
| Illiterate | 32 | | 15 | 2.60(1.41-4.82) | .430(0.160-1.154) | .094 |
